# Supplementary material
Source: Springer Nature journal article supplement (https://www.springermedizin.de/resource/supplementary/12936_2011_2436_MOESM5_ESM.pdf/9542468)

# Kilombero-Ulanga

# Rufiji

**Sp only**

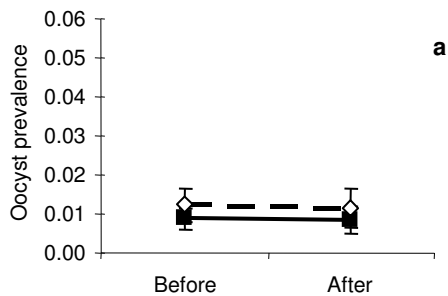

**As+Sp**

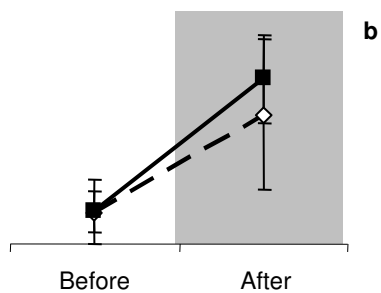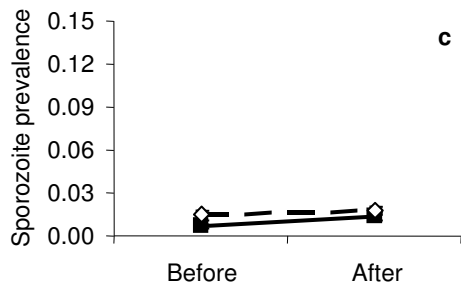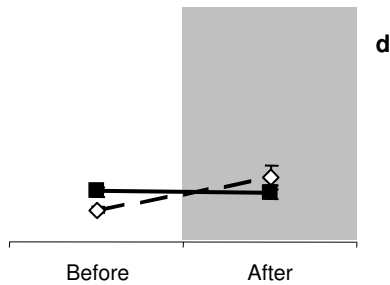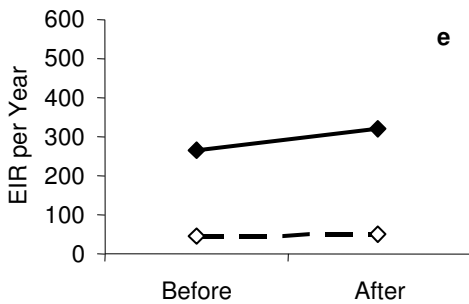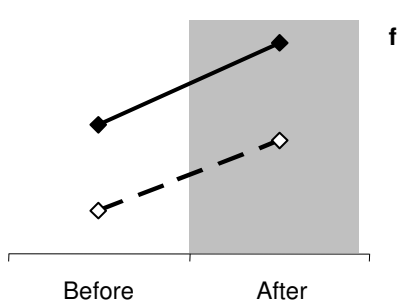

Supplement: MOESM5 [file 9542468]
